# Supplementary material for: Economical synthesis of cyclic carbonates from carbon dioxide and halohydrins using K2CO3
Source: Royal Society of Chemistry journal article supplement (doi:10.1039/c6ra13008a), 2016-01-01
Supplement: c6ra13008a1.pdf [file c6ra13008a1.pdf]

## Supporting Information

### Economical synthesis of cyclic carbonates from carbon dioxide and halohydrins using $K_2CO_3$

Takuji Hirose,<sup>a\*</sup> Shinsuke Shimizu,<sup>a</sup> Shujie Qu, Hiroaki Shitara,<sup>a</sup> Koichi Kodama<sup>a</sup> and Lin Wang<sup>a</sup>

<sup>a</sup> Graduate School of Science and Engineering, Saitama University, 255 Shimo-Okubo, Sakura-ku, Saitama 338-8570, Japan

\*: Corresponding author. E-mail: [hirose@apc.saitama-u.ac.jp](mailto:hirose@apc.saitama-u.ac.jp)

#### Table, Figure and Experimental Section:

|                                                                                                                                                 |         |
|-------------------------------------------------------------------------------------------------------------------------------------------------|---------|
| Table S1 Effect of Several Other Solvents                                                                                                       | .....S2 |
| Table S2 Effect of $Cs_2CO_3$ as Base for <b>1f</b> and <b>1g</b>                                                                               | .....S3 |
| Figure S1. EDX analysis of the precipitate after the reaction of 1-bromo-2-propanol and $CO_2$ in the presence of $K_2CO_3$ (Table 1, entry 9). | .....S4 |
| Figure S2. XRD profile of the precipitate after the reaction of 1-bromo-2-propanol and $CO_2$ in the presence of $K_2CO_3$ (Table 1, entry 9).  | .....S5 |
| <sup>1</sup> H NMR Spectral Charts                                                                                                              |         |
| • 2d + 2d'                                                                                                                                      | .....S6 |
| • 2f                                                                                                                                            | .....S7 |

**Table S1** Effect of Several Other Solvents

| Entry | Solvent                          | Dielectric const. | Yield (%) |
|-------|----------------------------------|-------------------|-----------|
| 1     | Toluene                          | 2.38              | 6         |
| 2     | C <sub>2</sub> H <sub>5</sub> OH | 24.5              | 62        |
| 3     | Dry DMF                          | 36.7              | 90        |
| 4     | DMF                              | (36.7)            | 90        |
| 4     | CH <sub>3</sub> CN               | 37.5              | 88        |
| 5     | DMSO                             | 46.7              | 88        |
| 6     | H <sub>2</sub> O                 | 80.1              | 32        |

<sup>a</sup> Reaction conditions: **1a** (5 mmol; 22% is 2-bromo-1-propanol), K<sub>2</sub>CO<sub>3</sub> (0.76 g, 5.5 mmol), CO<sub>2</sub> (99.999%, balloon). After solvent and K<sub>2</sub>CO<sub>3</sub> were stirred in the presence of CO<sub>2</sub> (1 atm) for 4 h at 30 °C, **1a** was added and reacted for 20 h. <sup>b</sup> Isolated yield.

<sup>c</sup> anhydrous (non-anhydrous and non-deoxygenated).

Table S2 Effect of Cs<sub>2</sub>CO<sub>3</sub> as Base for **1f**, **1g** and **1h**<sup>1</sup>

| Entry | Halohydrin                                                                                     | Product                                                                                        | Yield (%) |
|-------|------------------------------------------------------------------------------------------------|------------------------------------------------------------------------------------------------|-----------|
| 1     | <br><b>1f</b> | <br><b>2f</b> | 41        |
| 2     | <br><b>1g</b> | <br><b>2g</b> | 61        |
| 3     | <br><b>1h</b> | <br><b>2h</b> | 83        |

<sup>a</sup> Reaction conditions: **1a** (5 mmol; 22% is 2-bromo-1-propanol), Cs<sub>2</sub>CO<sub>3</sub> (0.76 g, 5.5 mmol), CO<sub>2</sub> (99.999%, balloon). After solvent and K<sub>2</sub>CO<sub>3</sub> were stirred in the presence of CO<sub>2</sub> (1 atm) for 4 h at 30 °C, **1a** was added and reacted for 20 h. <sup>b</sup> Isolated yield.

#### Reference

1. M. R. Reithofer, Y. N. Sum and Y. Zhang, *Green Chem.*, **2013**, *15*, 2086–2090.

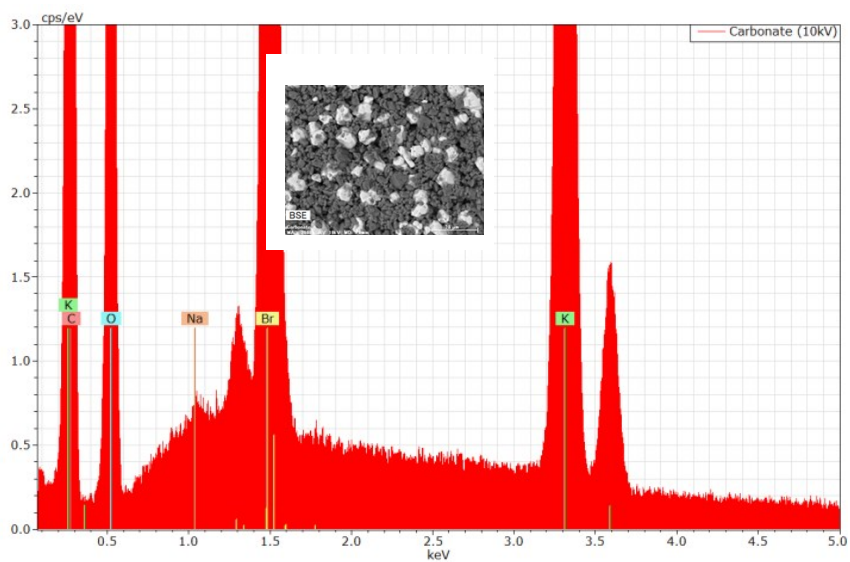

Figure S1. EDX analysis of the precipitate after the reaction of 1-bromo-2-propanol and  $\text{CO}_2$  in the presence of  $\text{K}_2\text{CO}_3$  (Table 1, entry 9).

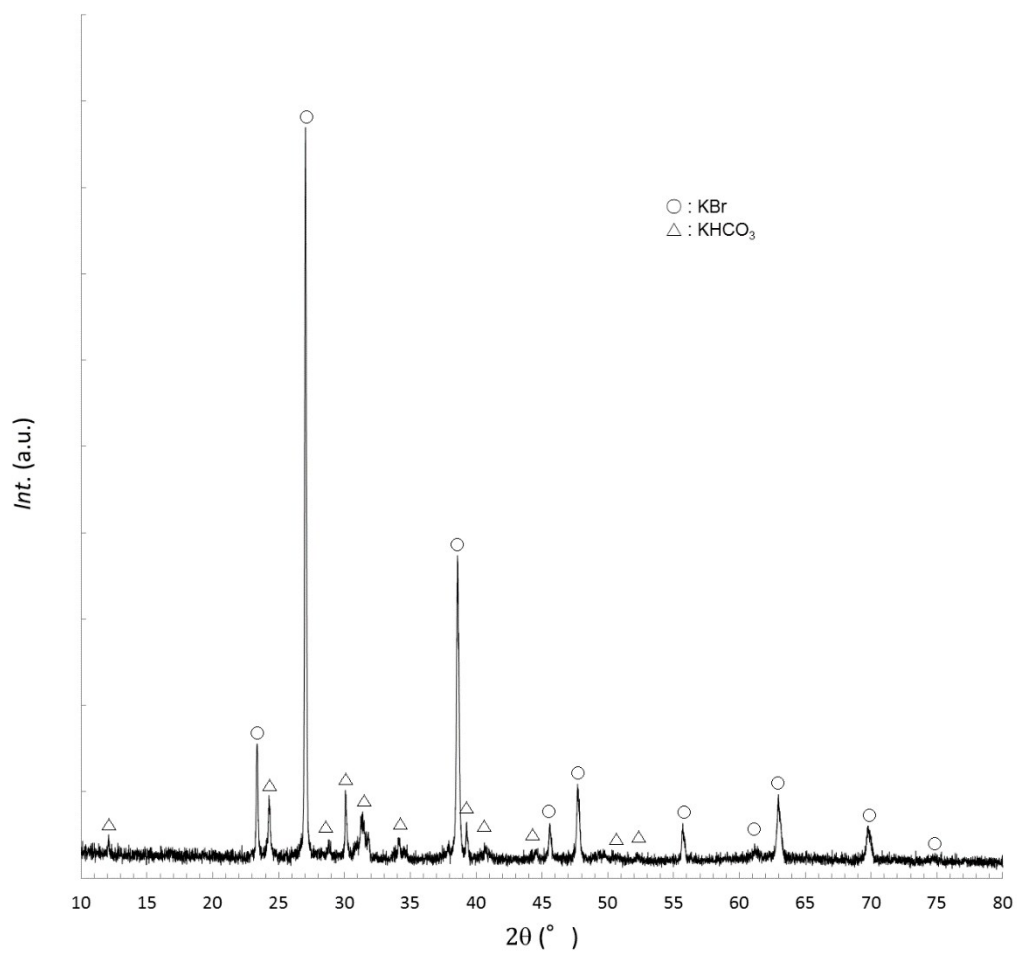

Figure S2. XRD profile of the precipitate after the reaction of 1-bromo2-propanol and CO<sub>2</sub> in the presence of K<sub>2</sub>CO<sub>3</sub> (Table 1, entry 9).

1H

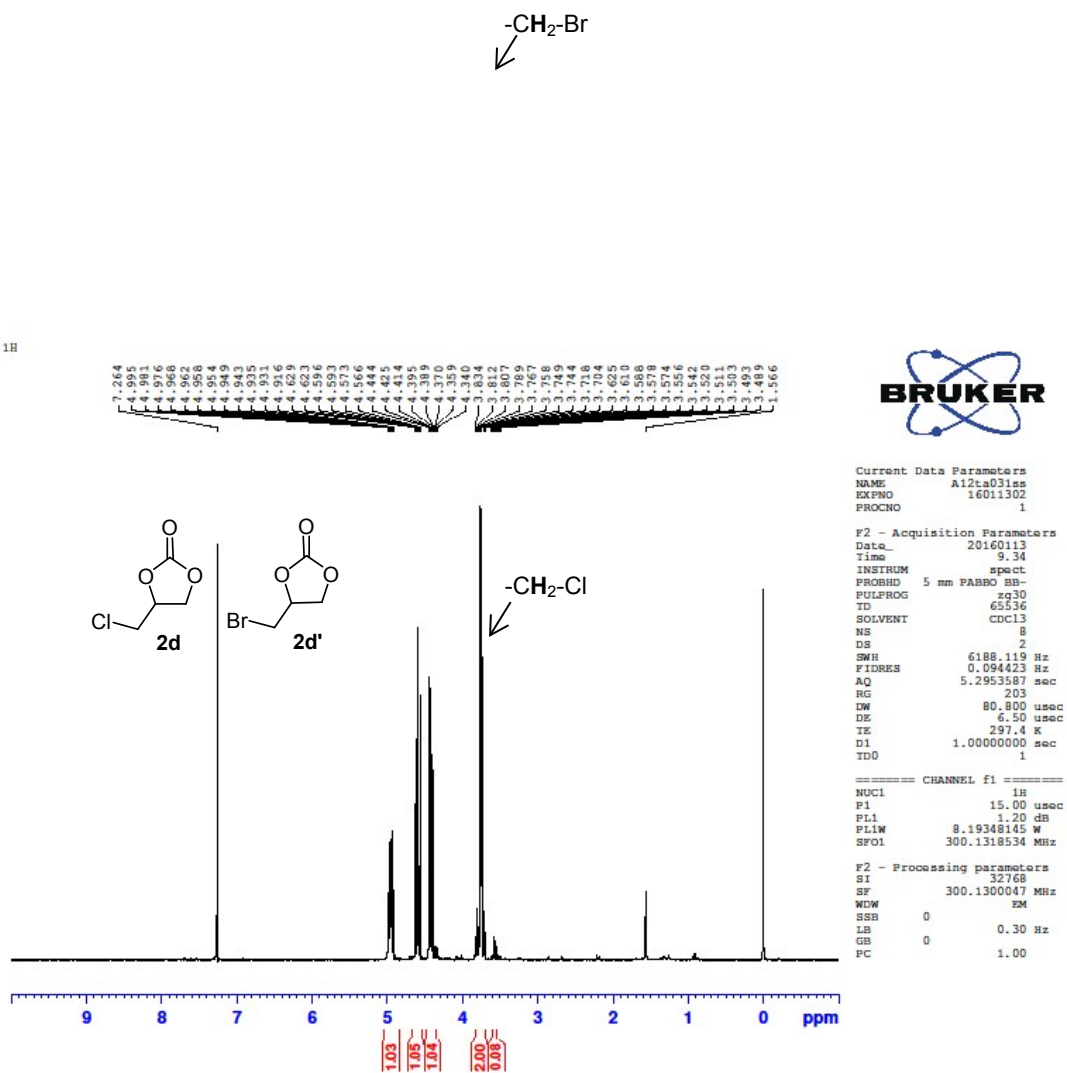

<sup>1</sup>H NMR (300 MHz, CDCl<sub>3</sub>): δ 5.00-4.92 (m), 4.63-4.57 (m), 4.44-4.34 (m), 3.83-3.74 (m), 3.72-3.49 (m).

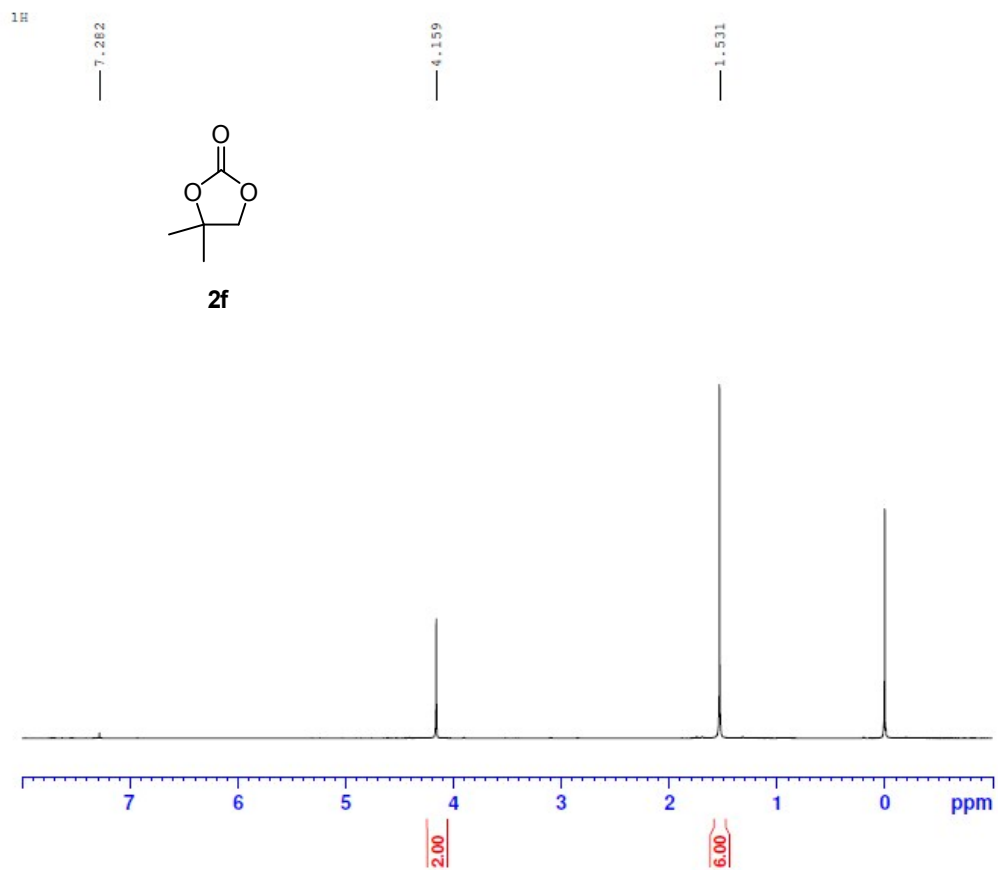

$^1\text{H NMR}$  (300 MHz,  $\text{CDCl}_3$ ):  $\delta$  4.15 (s), 1.53 (s).
